# Supplementary material
Source: PubMed Central journal article supplement (PMC7927648)
Supplement: mmc1.pdf [file mmc1.pdf]

Table S1: Hospital Course and Outcomes by Stage of Acute Kidney Injury

|                                              | Acute COVID-19      |                         |                         |                         | MIS-C                |                         |                         |                         |
|----------------------------------------------|---------------------|-------------------------|-------------------------|-------------------------|----------------------|-------------------------|-------------------------|-------------------------|
|                                              | No AKI<br>N = 89    | AKI<br>Stage 1<br>N = 6 | AKI<br>Stage 2<br>N = 1 | AKI<br>Stage 3<br>N = 1 | No AKI<br>N = 45     | AKI<br>Stage 1<br>N = 4 | AKI<br>Stage 2<br>N = 2 | AKI<br>Stage 3<br>N = 4 |
| Treatment N(%)                               |                     |                         |                         |                         |                      |                         |                         |                         |
| IVIG                                         | 10(11)              | 2(33)                   | 0(0)                    | 0(0)                    | 40(89)               | 4(100)                  | 2(100)                  | 3(75)                   |
| Anakinra                                     | 4(5)                | 0(0)                    | 1(100)                  | 1(100)                  | 3(7)                 | 2(50)                   | 1(50)                   | 0(0)                    |
| Hydroxychloroquine                           | 14(16)              | 2(33)                   | 1(100)                  | 1(100)                  | 1(2)                 | 0(0)                    | 0(0)                    | 1(25)                   |
| Remdesivir                                   | 5(6)                | 1(17)                   | 0(0)                    | 0(0)                    | 0(0)                 | 1(25)                   | 0(0)                    | 0(0)                    |
| Methylprednisolone<br>or Prednisone          | 14(16)              | 1(17)                   | 1(100)                  | 1(100)                  | 26(58)               | 4(100)                  | 2(100)                  | 2(50)                   |
| PICU (N%)                                    | 18 (20.2)           | 6 (100)                 | 1<br>(100)              | 1 (100)                 | 25 (55.6)            | 4 (100)                 | 2 (100)                 | 3 (75)                  |
| Length of PICU stay,<br>days                 | 3.1<br>(2.1,11)     | 7.7<br>(2.8,13.9)       | 20<br>(-)               | 16.6<br>(-)             | 3.4<br>(2.6,4.9)     | 11.1<br>(8.2,30.7)      | 6.8<br>(4.5,-)          | 3.7<br>(1.5, -)         |
| Ionotropes N(%)                              | 1(1)                | 2(33)                   | 0(0)                    | 1(100)                  | 7(16)                | 4(100)                  | 1(50)                   | 1(25)                   |
| Vasopressors N(%)                            | 3(3)                | 3(50)                   | 1(100)                  | 1(100)                  | 18(40)               | 4(100)                  | 2(100)                  | 3(75)                   |
| ECMO N(%)                                    | 1 (1.1)             | 1 (16.7)                | 0 (0)                   | 0 (0)                   | 0 (0)                | 0 (0)                   | 0 (0)                   | 0 (0)                   |
| Mechanical<br>Ventilation N(%)               | 4 (4.5)             | 2 (33.3)                | 1<br>(100)              | 1 (100)                 | 1 (2.2)              | 2 (50)                  | 1 (50)                  | 1 (25)                  |
| Length of<br>mechanical<br>ventilation, days | 10 (6,14)           | 4 (4,4)                 | 1 (1,1)                 | 13<br>(13,13)           | 2 (2,2)              | 3.5 (3,-)               | 2 (2,2)                 | 5 (5,5)                 |
| Length of hospital<br>stay, days             | 2.8<br>(1.6,6.2)    | 17.4<br>(9.2,31.5)      | 25.6<br>(-)             | 27.5<br>(-)             | 4.6<br>(3.5, 6.3)    | 11.4<br>(8.3,15)        | 8.9<br>(4.5, -)         | 4.2<br>(3.2,7.7)        |
| Median creatinine,<br>mg/dL                  | 0.34<br>(0.23,0.5)  | 0.57<br>(0.25,0.87)     | 0.6<br>(-)              | 0.78<br>(-)             | 0.37<br>(0.28, 0.51) | 0.7<br>(0.67 0.75)      | 0.71<br>(0.65,-)        | 0.8<br>(0.6,2)          |
| Peak creatinine,<br>mg/dL                    | 0.39<br>(0.26,0.57) | 0.73<br>(0.38,1.4)      | 2.1<br>(-)              | 2.3<br>(-)              | 0.49<br>(0.31, 0.7)  | 1.4<br>(1,1.8)          | 1.5<br>(1.5,-)          | 3.1<br>(2.4,4.4)        |
| Discharge creatinine,<br>mg/dL               | 0.33<br>(0.23,0.5)  | 0.26<br>(0.21,0.61)     | 0.71<br>(-)             | 0.25<br>(-)             | 0.36<br>(0.26, 0.47) | 0.52<br>(0.32,0.58)     | 0.38<br>(0.38,-)        | 0.48<br>(0.34,0.9)      |
| Discharge eGFR,<br>mL/min/1.73m <sup>2</sup> | 159<br>(114,119)    | 121<br>(65,220)         | 170<br>(-)              | 174<br>(-)              | 189<br>(159, 212)    | 211<br>(140,242)        | 183<br>(174, 83)        | 142<br>(89,178)         |
| Mortality (%)                                | 1 (1.1)             | 1 (16.7)                | 0 (0)                   | 0 (0)                   | 0 (0)                | 0 (0)                   | 0 (0)                   | 0 (0)                   |

IVIG Intravenous Immunoglobulin, PICU Pediatric ICU, ECMO Extracorporeal Membranous Oxygenation, eGFR Estimated glomerular filtration rate based on original Schwartz equation

Table S2. Echocardiographic Data in MIS-C patients with and without Acute Kidney Injury (N=49)

|                        | No AKI     | AKI        | Total      | p-value |
|------------------------|------------|------------|------------|---------|
|                        | N=39       | N=10       | N=49       |         |
| Lowest LVEF*           | 56 (49-62) | 49 (40-54) | 54 (49-61) | 0.020   |
| Systolic Dysfunction** | 17 (43.5%) | 8 (80%)    | 25 (49%)   | 0.038   |
| Coronary dilation***   | 10 (25.6%) | 3 (30%)    | 13 (25%)   | 0.70    |

MIS-C – Multisystem Inflammatory Syndrome in Children, AKI – Acute Kidney Injury, LVEF Left ventricular ejection fraction

\*Nadir left ventricular ejection fraction extrapolated from EMR.

\*\*LVEF<55%

\*\*\*>2mm

Table S3. Admission characteristics and laboratory values by Admission Unit:  
Pediatric Intensive Care Unit vs Medical/Surgical Floor

|                                           | PICU Admission<br>N=60 | Medical/Surgical Admission<br>N=92 | P Value |
|-------------------------------------------|------------------------|------------------------------------|---------|
| Age, year                                 | 10.5 (4.7, 14.5)       | 6.8 (1.8, 11.3)                    | 0.010   |
| Male N (%)                                | 49 (53.3)              | 36 (60)                            | 0.5     |
| Race N (%)                                |                        |                                    | 0.36    |
| White                                     | 5 (8.3)                | 16 (17.4)                          |         |
| Black                                     | 19 (31.7)              | 18 (19.6)                          |         |
| Asian                                     | 7 (11.7)               | 9 (9.8)                            |         |
| Other                                     | 26 (43.3)              | 45 (48)                            |         |
| Unknown                                   | 3 (5.0)                | 4 (4.3)                            |         |
| Ethnicity N (%)                           |                        |                                    | 0.35    |
| Hispanic/Latino                           | 13 (21.7)              | 26 (28.3)                          |         |
| Not Hispanic/Latino                       | 45 (75.0)              | 59 (64.1)                          |         |
| Other/Unknown                             | 2 (3.3)                | 7 (7.6)                            |         |
| BMI z-score                               | 0 (-0.01, 1.9)         | 0.75 (-0.06, 1.8)                  | 0.40    |
| Obese N (%)                               | 10 (18.9)              | 16 (23.9)                          | 0.66    |
| Children's Hospital N(%)                  | 59 (98.3)              | 81 (88.0)                          | 0.03    |
| Presenting Symptoms N (%)                 |                        |                                    |         |
| Gastrointestinal                          | 42 (70)                | 54 (58.7)                          | 0.17    |
| Fever                                     | 47 (78.3)              | 73 (79.3)                          | >0.99   |
| Cough                                     | 13 (21.7)              | 15 (16.3)                          | 0.52    |
| Rash                                      | 21 (35.0)              | 22 (23.9)                          | 0.15    |
| Myalgias/joint aches                      | 8 (13.3)               | 4 (4.3)                            | 0.06    |
| Comorbid Condition N (%)                  |                        |                                    |         |
| Hypertension                              | 1 (1.7)                | 0 (0)                              | 0.39    |
| Diabetes Mellitus                         | 0 (0)                  | 1 (1.1)                            | >0.99   |
| Asthma                                    | 6 (10)                 | 7 (7.6)                            | 0.77    |
| Cancer                                    | 3 (5)                  | 1 (1.1)                            | 0.30    |
| Congenital Heart Disease                  | 4 (6.7)                | 5 (5.4)                            | 0.74    |
| Immunosuppressed                          | 3 (5)                  | 2 (2.2)                            | 0.38    |
| Baseline SCr, mg/dL*                      | 0.54 (0.39, 0.66)      | 0.65 (0.49, 0.76)                  | 0.002   |
| Admission SCr, mg/dL                      | 0.35 (0.24, 0.50)      | 0.62 (0.40, 0.90)                  | <0.001  |
| Admission eGFR, mL/min/1.73m <sup>2</sup> | 160 (117, 191)         | 121 (87-156)                       | <0.001  |
| Sodium, mEq/L                             | 136 (132, 137)         | 136 (134, 138)                     | 0.13    |
| Potassium, mEq/L                          | 3.9 (3.7, 4.4)         | 4.25 (3.9, 4.9)                    | 0.009   |
| Bicarbonate, mEq/L                        | 20 (17, 23)            | 21 (19, 23)                        | 0.16    |
| Magnesium, mEq/L                          | 2.1 (1.9, 2.3)         | 2 (1.8, 2.2)                       | 0.03    |
| Calcium, mg/dL                            | 8.8 (8.3, 9.3)         | 9.6 (9.2, 10)                      | <0.001  |
| Albumin mg/dL                             | 3.45 (2.8-3.9)         | 4.1 (3.9, 4.5)                     | <0.001  |
| White blood cell, mm <sup>3</sup>         | 9.9 (7.1, 14.5)        | 9.5 (6.2, 13.2)                    | 0.35    |
| Hemoglobin, g/dL                          | 11.2 (10.3, 12.1)      | 11.6 (10.3, 12.7)                  | 0.30    |
| Platelets, mm <sup>3</sup>                | 183 (119, 255)         | 273 (191, 349)                     | <0.001  |
| LDH, U/L                                  | 323.5 (280, 456)       | 318 (219, 422)                     | 0.21    |
| Fibrinogen, mg/dL                         | 635 (506, 768)         | 608 (479, 730)                     | 0.49    |
| CRP, ug/mL                                | 125 (49, 225)          | 48.5 (12.7-116.29)                 | <0.001  |
| D-dimer, mcg/mL                           | 1439 (659, 2466)       | 549 (379, 780)                     | <0.001  |
| Acute Kidney Injury N (%)                 | 17 (28.3)              | 1 (1.1)                            | <0.001  |

AKI – acute kidney injury, BMI – body mass index, SCr- serum creatinine, eGFR – estimated glomerular filtration rate, LDH – lactate dehydrogenase, CRP- c reactive protein

\* Baseline SCr - estimated from assumed eGFR 120ml/min/1.73m<sup>2</sup> using original Schwartz formula<sup>34</sup>

Table S4: Logistic regression analyses of baseline demographics and clinical variables associated with acute kidney injury in COVID and MIS-C\*

| Variable                                             | Unadjusted OR (95%CI)   | P Value |
|------------------------------------------------------|-------------------------|---------|
| Age, years                                           | 1.01 (0.93, 1.1)        | 0.83    |
| Male<br>(ref female)                                 | 0.79 (0.29, 2.1)        | 0.64    |
| Black Race                                           | 2.86 (1.04, 7.93)       | 0.042   |
| Hispanic Ethnicity<br>(ref non-Hispanic)             | 0.33 (0.07, 1.5)        | 0.15    |
| Children's Hospital<br>(ref non-children's hospital) | 2.3x10 <sup>8</sup> (-) | 0.99    |
| BMI z-score                                          | 1.24 (0.86, 1.8)        | 0.25    |
| Obesity<br>(ref no obesity)                          | 1.91 (0.61, 6)          | 0.26    |
| Gastrointestinal symptoms                            | 2.2 (0.69, 7.1)         | 0.18    |
| Fever                                                | 0.66 (0.22, 2)          | 0.46    |
| Cough                                                | 0.52 (0.11, 2.4)        | 0.15    |
| Comorbid Condition*                                  | 1.96 (0.63, 6.1)        | 0.24    |
| Admission eGFR<br>(mL/min/1.73m <sup>2</sup> )       | 0.96 (0.94, 0.97)       | <0.0001 |
| Admission Labs:                                      |                         |         |
| Sodium (meq/L)                                       | 0.91 (0.8, 1.04)        | 0.17    |
| Potassium (meq/L)                                    | 0.8 (0.41, 1.6)         | 0.5     |
| Bicarbonate (meq/L)                                  | 0.87 (0.7, 0.99)        | 0.03    |
| Calcium (mg/dL)                                      | 0.35 (0.18, 0.66)       | 0.001   |
| Albumin (g/dL)                                       | 0.17 (0.07, 0.39)       | <0.001  |
| CRP (mg/L)                                           | 1.01 (1.004, 1.01)      | <0.001  |
| Fibrinogen (mg/dL)                                   | 1.002 (0.99, 1.004)     | 0.14    |
| D-dimer (mcg/mL)                                     | 1 (1,1)                 | 0.26    |
| LDH (U/L)                                            | 1.001 (1, 1.002)        | 0.07    |
| Hemoglobin (g/dL)                                    | 0.89 (0.71, 1.1)        | 0.31    |
| WBC (mm <sup>3</sup> )                               | 1.11 (1.04, 1.2)        | 0.003   |
| Platelets (mm <sup>3</sup> )                         | 0.99 (0.99,1)           | 0.07    |
| PICU admission                                       | 35.9 (4.6, 279)         | 0.001   |
| Nephrotoxic medication<br>exposure* (N=5)            | 5.5 (1.33, 22.6)        | 0.018   |

MIS-C – Multisystem Inflammatory Syndrome in Children, OR- odds ratio, ref- reference, BMI – body mass index, eGFR – estimated glomerular filtration rate, LDH – lactate dehydrogenase, CRP- c reactive protein, WBC – white blood cells

\* COVID-19 and MIS-C analyzed together as one group

Comorbid condition include cancer, congenital heart disease, hypertension, immunosuppressed status, asthma, diabetes mellitus.

Nephrotoxic medication exposure includes angiotensin converting enzyme inhibitor/angiotensin receptor blockers, nonsteroidal inflammatory agents, vancomycin/aminoglycosides
